# Supplementary material for: Endoglin Promotes Myofibroblast Differentiation and Extracellular Matrix Production in Diabetic Nephropathy
Source: PubMed Central journal article supplement (PMC7589772; doi:10.3390/ijms21207713), 2020-10-18
Supplement: ijms-21-07713-s001.pdf [file ijms-21-07713-s001.pdf]

Supplemental Table 1: Baseline characteristics of patients with histological confirmation of DN sorted by endoglin score

| Characteristic                     |               | Eng <25%<br>(n=20) | Eng 25%-50%<br>(n=25) | Eng >50%<br>(n=10) | P                             |                    |
|------------------------------------|---------------|--------------------|-----------------------|--------------------|-------------------------------|--------------------|
| Male sex                           | n (%)         | 12 (60.0)          | 17 (68.0)             | 5 (50.0)           | 0.601*                        |                    |
| Age (years)                        | Mean ± SD     | 63.3 ± 16.9        | 70.2 ± 11.7           | 68.5 ± 10.3        | 0.101 <sup>†</sup>            |                    |
| Type 1 Diabetes                    | n (%)         | 3 (17.6)           | 1 (4.3)               | 1 (12.5)           | 0.372*                        |                    |
| eGFR (ml/min/1.73 m <sup>2</sup> ) | Mean ± SD     | 60.3 ± 37.9        | 59.4 ± 33.2           | 21.3 ± 15.9        | <b>0.007</b> <sup>†</sup>     |                    |
| Serum creatinine (µmol/L)          | Mean ± SD     | 116.6 ± 69.4       | 137.1 ± 88.6          | 300.8 ± 129.8      | <b>&lt;0.001</b> <sup>†</sup> |                    |
| Systolic blood pressure (mmHg)     | Mean ± SD     | 133.5 ± 26.8       | 134.3 ± 30.9          | 168.9 ± 30.8       | <b>0.049</b> <sup>†</sup>     |                    |
| Diastolic blood pressure (mmHg)    | Mean ± SD     | 76.0 ± 15.1        | 76.0 ± 11.6           | 78.3 ± 6.5         | 0.823 <sup>†</sup>            |                    |
| HbA1c (%)                          | Mean ± SD     | 7.2 ± 1.5          | 8.4 ± 2.2             | 9.3 ± 3.5          | 0.162 <sup>†</sup>            |                    |
| Hypertension present               | n (%)         | 5 (35.7)           | 15 (65.2)             | 6 (85.7)           | <b>0.021</b> *                |                    |
| IFTA                               | Index score 0 | n (%)              | 8 (40)                | 1 (4)              | 0 (0)                         |                    |
|                                    | Index score 1 | n (%)              | 11 (55)               | 15 (60)            | 2 (20)                        |                    |
|                                    | Index score 2 | n (%)              | 1 (5)                 | 7 (28)             | 3 (30)                        |                    |
|                                    | Index score 3 | n (%)              | 0 (0)                 | 2 (8)              | 5 (50)                        | <b>&lt;0.001</b> * |

\*= calculated with a Chi-squared test; †= calculated with a Spearman's rank correlation.
